# Supplementary material for: A Mixed-Methods Evaluation of a Statewide Naloxone Distribution Project: Considerations for Future Implementation of Opioid Overdose Prevention Initiatives
Source: Research Square preprint supplement (doi:10.21203/rs.3.rs-7142082/v1), 2025-10-22
Supplement: Supplementary file 1 [file c9f9f7de0e2d38bc0a6baadc.docx]

**Access Interview Guide –** **Overdose education and naloxone distribution programs (OENDs)**

Thank you for taking the time to speak with us today. My name is [insert name] and I am a [insert title] at NORC at the University of Chicago. My colleague, [insert name], is also on the call and will be taking notes. Before we get started, I’m going to provide a bit of background about the project. NORC has been contracted by the University of Illinois Chicago to assist with an evaluation of the Access Project funded by the Illinois Department of Human Services Division of Substance Use Prevention & Recovery (IDHS/SUPR).

The purpose of this interview is to learn about your experiences with the Access Project, including learning more about your involvement, what you believe has worked well, and challenges to ordering and distributing the nasal naloxone in communities. We will also discuss potential outcomes of the project and the sustainability of naloxone distribution efforts. We are conducting interviews with state program leaders and policy stakeholders, and drug overdose prevention program (DOPP) enrollees that order nasal naloxone through the Access site. Information collected during these interviews will be compiled and summarized in order to evaluate the project and to identify recommendations for future naloxone distribution initiatives.

We have developed a set of questions to guide our discussion, but please feel free to raise additional issues or elaborate on areas you feel are important to our understanding of the project. We are interested in your perspective and there are no right or wrong answers. We expect to complete this interview within 60 minutes.

There are no foreseeable risks related to completing the interview. Your participation is voluntary and confidential. You may choose to skip any question or stop the interview at any time. SUPR, the Division of Substance Use Prevention & Recovery, may receive a brief/presentation that summarizes findings but NORC will not share any organizational-level information with the public or other participating organizations.

We would like to record this interview to ensure our notes are as accurate and comprehensive as possible. The recording and notes will not be shared outside of the research team.

Do you have any questions?

**Do you consent to participating in this interview?**

**Do you consent to have this interview recorded?**

*[Notetaker start the recording]*

# Background

We’ll start out with some brief background questions.

1. Please tell me about the OEND that you work for.
   1. What is it called and where is it located? (prompts: rural/urban)
   2. What kind of services are provided? (prompts: overdose education, naloxone distribution, fentanyl test strips, medications for opioid use disorder, syringe services, HIV/AIDS resources)
   3. Please describe your role at the OEND. How long have you worked there?
   4. To what kinds of organizations does your OEND distribute nasal naloxone to? (prompts: jails, churches)
      1. Do you supply nasal naloxone to DOPP enrollees, or just organizations that are not enrolled in the DOPP?
      2. What is the process for organizations to request nasal naloxone from OENDs?
         1. [if applicable] Does this process differ for DOPPs versus non-DOPPs?
      3. Does your organization order all nasal naloxone through the Access portal, or are there other avenues through which you order naloxone?
         1. If organizations can request nasal naloxone (even in bulk) from OENDs without being registered with the DOPP, what incentivizes organizations to register with DOPP? (prompts: to use Illinois standing order, encouragement from IDHS/SUPR, to use Access site)
   5. How is nasal naloxone ordering and distribution for your OEND funded? (prompts: federal/SAMHSA funds, grants, Cannabis Tax Act and Regulation (CRTA) funds, other)
2. Generally, what are the key challenges to nasal naloxone distribution and use? (prompts: cost, bias/stigma, availability [provider willing to prescribe/pharmacy availability], pharmacist education/support, patient/user education, access [transportation, proximity of provider/pharmacy])

# Naloxone Sources

Now, we’ll move onto some questions about where your OEND gets its nasal naloxone supply, including the role that the Access Project plays in your overall naloxone distribution efforts.

1. Generally, can you describe your OEND’s involvement with the Access Project?
   1. How does the Access Project contribute to your OEND’s nasal naloxone distribution efforts?
2. Is the Access site your primary source for ordering and distributing nasal naloxone? Do you order nasal naloxone or other forms of naloxone from any other sources?
   1. If so, what are they?

# Access Project Processes

Now, we’d like to go into more detail about the specific processes of the Access Project. We’re also interested in learning about barriers and facilitators that occur during different parts of the process.

1. Could you walk us through the process of how your OEND orders nasal naloxone through the Access site, step-by-step?
   1. What are the challenges to ordering nasal naloxone through this portal?
      1. What could make ordering nasal naloxone through this portal easier?
   2. What has worked well related to ordering nasal naloxone through this portal?
2. Could you walk us through the process of how your OEND receives nasal naloxone through the Access site? Are orders shipped to your headquarters? Does your organization pick up the nasal naloxone somewhere?
   1. What are the challenges to receiving nasal naloxone through the Access Project?
      1. What could make receiving nasal naloxone through the Access Project easier?
   2. What has worked well related to receiving nasal naloxone through the Access Project?
3. Once your OEND receives the nasal naloxone ordered through the Access site, how is it distributed to other organizations (DOPPs and/or non-DOPPs)?
   1. What are the challenges to delivering the nasal naloxone associated with this project to other organizations?
      1. What could make delivering the nasal naloxone associated with this project to other organizations easier?
   2. What has worked well related to delivering the nasal naloxone associated with this project to other organizations?
4. Does your OEND also distribute nasal naloxone from the Access Project to people who use drugs, their friends and families, and community members?
   1. If so, what does this process look like? (prompts: stored at facility to use, hand out for free, put somewhere for people to retrieve anonymously)
   2. How does the process differ from distributing nasal naloxone to other organizations?
5. After your OEND distributes the nasal naloxone received from the Access site, how is this nasal naloxone distribution reported/recorded?
   1. Does your OEND report nasal naloxone distribution in the ILSavesOD portal?
      1. Why or why not?
   2. What are the challenges to reporting/recording nasal naloxone distribution?
      1. What could make reporting/recording nasal naloxone distribution associated with this project easier?
      2. ~~How could we improve the ability to understand who is actually receiving the nasal naloxone once distributed?~~
   3. What has worked well related to reporting/recording nasal naloxone distribution associated with this project?
6. What happens after the nasal naloxone is distributed?
   1. Is there any way to track who in the community is actually receiving the nasal naloxone? (prompts: people who use drugs, their family and friends, bystanders, health care providers)
   2. Is there a way to track how the naloxone is being used?
   3. Do those who receive the nasal naloxone provide updates back to your OEND as to whether the nasal naloxone was used/administered?

# Potential Outcomes and Recommendations

Lastly, I’ve got some bigger picture questions about the Access Project, including potential outcomes of the project and recommendations for future initiatives.

1. Overall, do you perceive this project to be effective in reducing overdoses and fatalities? Why or why not?
   1. Why do you think that overdoses continue to increase or hold steady despite the widespread distribution of naloxone?
   2. What would you change about the project to make it more effective in reducing overdoses and fatalities?
   3. Would you like to see the Access Project provide intramuscular naloxone in addition to the nasal naloxone option?
2. What are some positive outcomes that you expect or have seen from implementation of this project? Please provide examples, if possible.
   1. Who do you think will benefit from the Access Project the most? (prompts: people who use drugs, bystanders, friends and family, harm reduction organizations, naloxone distributors)
   2. What areas do you think will benefit from the Access Project the most? (prompts: areas with high OD rates, low-income areas, rural/urban areas)
3. What are some potential unintended consequences, challenges, or drawbacks related to this project, if any?
   1. Are there any groups that may not benefit as much from the project? (prompts: rural areas, tribes, families with low income, older adults, adolescents, criminal justice-involved individuals including those in correctional facilities)
      1. What could be done to help these groups benefit more from the project?
4. If funding for Access were to be reduced or eliminated, how would this impact your naloxone distribution efforts?
5. Considering what we’ve discussed today, do you have any recommendations for future initiatives aiming to reduce opioid overdose deaths in Illinois?
6. We are also interested in hearing the perspectives of organizations that are not enrolled in the DOPP, who opt to order naloxone in bulk from OENDs instead. Do you know of any organizations like that that may be willing to answer a few questions about their naloxone distribution efforts via email? If so, could you provide their contact information, including names and email addresses?
7. That wraps up my questions for today. Do you have anything else you’d like to share?

Thank you so much for sharing your experiences with the Access Project with us. We really appreciate it.

Please don’t hesitate to reach out with any questions that may come up following the interview. Enjoy the rest of your day!
